## CORRECTION

# Correction: Gender differential in low psychological health and low subjective well-being among older adults in India: With special focus on childless older adults

Ratna Patel, Strong P. Marbaniang, Shobhit Srivastava, Pradeep Kumar, Shekhar Chauhan, David Jean Simon

The sixth author's name is spelled incorrectly. The correct name is: David Jean Simon.

## Reference

1. Patel R, Marbaniang SP, Srivastava S, Kumar P, Chauhan S, Simon DJ (2021) Gender differential in low psychological health and low subjective well-being among older adults in India: With special focus on childless older adults. PLoS ONE 16(3): e0247943. <https://doi.org/10.1371/journal.pone.0247943> PMID: 33684164

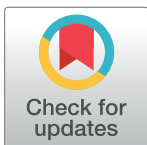

## OPEN ACCESS

**Citation:** Patel R, Marbaniang SP, Srivastava S, Kumar P, Chauhan S, Simon DJ (2022) Correction: Gender differential in low psychological health and low subjective well-being among older adults in India: With special focus on childless older adults. PLoS ONE 17(7): e0271858. <https://doi.org/10.1371/journal.pone.0271858>

**Published:** July 18, 2022

**Copyright:** © 2022 Patel et al. This is an open access article distributed under the terms of the [Creative Commons Attribution License](https://creativecommons.org/licenses/by/4.0/), which permits unrestricted use, distribution, and reproduction in any medium, provided the original author and source are credited.
